# Supplementary material for: The Use of Thromboelastography in Percutaneous Coronary Intervention and Acute Coronary Syndrome in East Asia: A Systematic Literature Review
Source: MDPI journal article supplement (doi:10.3390/jcm11133652), 2022-06-24
Supplement: s1 [file s1]

# The use of thromboelastography in percutaneous coronary intervention and acute coronary syndrome in East Asia: A systematic literature review

**Authors:** Ou Xu<sup>1</sup>, Jan Hartmann<sup>1</sup>, Tang Yi-Da<sup>2</sup>, Joao Dias<sup>1</sup>

## Supplementary material

**Table S1:** Search terms

| Interventional cardiology terms                                                                                                                                                                                                                  | Drug treatment of cardiovascular disease terms                                                                                                                                                                                                                                                | Countries when investigators are bases                                                                                                                                                                                                  | TEG technology terms                                                        | Filters                                                                               |
|--------------------------------------------------------------------------------------------------------------------------------------------------------------------------------------------------------------------------------------------------|-----------------------------------------------------------------------------------------------------------------------------------------------------------------------------------------------------------------------------------------------------------------------------------------------|-----------------------------------------------------------------------------------------------------------------------------------------------------------------------------------------------------------------------------------------|-----------------------------------------------------------------------------|---------------------------------------------------------------------------------------|
| percutaneous coronary intervention<br>OR<br>PCI<br>OR<br>transcatheter aortic valve replacement<br>OR<br>transcatheter aortic valve implant*<br>OR<br>transcatheter aortic valve intervent*<br>OR<br>TAVR<br>OR<br>TAVI<br>OR<br>electrophysiol* | [arrhythmia*<br>OR<br>acute coronary syndrome*<br>OR<br>coronary artery disease<br>OR<br>heart<br>OR<br>myocardial<br>OR<br>coronary<br>OR<br>cardiac<br>OR<br>cardiovascular]<br>AND<br>[platelet aggregation inhibitors<br>OR<br>antiplatelet<br>OR<br>anticoagulant<br>OR<br>antithrombo*] | China<br>OR<br>Japan<br>OR<br>Korea<br>OR<br>Thailand<br>OR<br>Singapore<br>OR<br>Hong Kong<br>OR<br>Malaysia<br>OR<br>Indonesia<br>OR<br>Philippines<br>OR<br>Myanmar<br>OR<br>Laos<br>OR<br>Cambodia<br>OR<br>Vietnam<br>OR<br>Taiwan | Thromboelasto*<br>OR<br>TEG<br>OR<br>Thrombelasto*<br>OR<br>PlateletMapping | Published in the last 10 years<br>AND<br>[English language<br>OR<br>Chinese language] |

**Table S2:** SIGN grading

| Article                                                       | Study Type                                           | SIGN Rating* |
|---------------------------------------------------------------|------------------------------------------------------|--------------|
| <b>PubMed: English language studies</b>                       |                                                      |              |
| Yan, XQ, et al. Ann Palliat Med 2021. 10(3):2448-2457         | Non-randomized prospective study                     | 2+ or 2-     |
| Gorog, DA, et al. Cardiovasc Res 2021. 117(2): 623-634        | RCT                                                  | 1-           |
| Wu, HY et al. Acta Pharmacol Sin 2020. 41(2): 192-197         | Post hoc analysis of prospective observational study | 2+ or 2-     |
| Wei, W et al. J Thorac Dis 2020. 12(10): 5811-5821            | Non-randomized observational study                   | 2+           |
| Park, Y et al. J Clin Med 2020. 9(6): 1678                    | RCT                                                  | 1+           |
| Cheng, D et al. Biosci Rep 2020. 40(7)                        | Non-randomized prospective study                     | 2+ or 2-     |
| Peng, W et al. Cardiovasc Ther 2019.                          | Non-randomized prospective study                     | 2-           |
| Li, X et al. Front Pharmacol 2019. 10: 1158                   | Non-randomized prospective study                     | 2-           |
| Li, X et al. Basic Clin Pharmacol Toxicol 2019. 124(1): 84-93 | Non-randomized prospective study                     | 2-           |
| Cao, B et al. Aging (Albany NY) 2019. 11(20): 8925-8936       | RCT                                                  | 2-           |
| Zhuo, ZL et al. Anatol J Cardiol 2018. 19(2): 123-129         | Non-randomized prospective study                     | 2-           |
| Yang, B et al. Iran J Public Health 2018. 47(7): 952-957      | RCT                                                  | 1+           |
| Tang, YD et al. Circulation 2018. 137(21): 2231-2245          | RCT                                                  | 1+           |
| Hou, X et al. J Clin Lab Anal 2018. 32(5): e22369             | Non-randomized prospective study                     | 2+           |
| Gong, W et al. J Am Heart Assoc 2018. 7(15): e008808          | Non-randomized prospective study                     | 2+           |
| Zhu, P et al. Chin Med J (Engl) 2017. 130: 2899-2905          | Non-randomized prospective study                     | 2+           |
| Nie, XY et al. J Zhejiang Univ Sci B 2017. 18(1): 37-47       | Non-randomized prospective study                     | 2-           |
| Fu, DL et al. Chin Med J (Engl) 2017. 130(16): 1914-1918      | Non-randomized prospective study                     | 2-           |
| Yao, Y et al. Chin Med J (Engl) 2016. 129(19): 2269-2274      | Non-randomized prospective study                     | 2-           |
| Li, DD et al. J Geriatr Cardiol 2016. 13(4): 282-289          | Non-randomized prospective study                     | 2-           |

|                                                                           |                                                  |    |
|---------------------------------------------------------------------------|--------------------------------------------------|----|
| Dong, P et al. Med Sci Monit 2016. 22: 4929-4936                          | RCT                                              | 2- |
| Wu, ZK et al. J Geriatr Cardiol 2015. 12(4): 378-382                      | Non-randomized prospective study                 | 2+ |
| Tang, XF et al. Chin Med J (Engl) 2015. 128(6): 774-779                   | Non-randomized prospective study                 | 2+ |
| Sun, B et al. Genet Mol Res 2015. 14(1): 1434-1442                        | Non-randomized prospective study                 | 2- |
| Liu, J et al. Chin Med J (Engl) 2015. 128(16): 2183-2188                  | Non-randomized prospective study                 | 2- |
| Zhu, P et al. Platelets 2021. 32(5):684-689                               | Non-randomized prospective study                 | 2+ |
| Zhang, M et al. Eur Rev Med Pharmacol Sci 2020. 24(20): 10753-10768       | RCT                                              | 1  |
| Zhu, P et al. Platelets 2019. 30(7): 901-907                              | Non-randomized prospective study                 | 2- |
| Koh, JS et al. Thromb Haemost 2019. 119(2): 264-273                       | RCT                                              | 1  |
| Zhang, S et al. Cardiology 2018. 140(1): 21-29                            | Non-randomized prospective study                 | 1  |
| Chen, Y et al. Cardiovasc J Afr 2018. 29(6): 357-361                      | Non-randomized prospective cross-sectional study | 2+ |
| Song, Y et al. Biomed Environ Sci 2017. 30(12): 898-906                   | Non-randomized prospective study                 | 2+ |
| Koh, JS et al. Platelets 2017. 28(2): 187-193                             | RCT                                              | 1+ |
| Yao, Y et al. Thromb Res 2016. 141: 28-34                                 | Non-randomized prospective study                 | 2- |
| Tang, N et al. Scand J Clin Lab Invest 2015. 75(3): 223-229               | Non-randomized prospective study                 | 2+ |
| Tian, KP et al. Nan Fang Yi Ke Da Xue Xue Bao 2016. 37(4): 533-536        | Non-randomized prospective study                 | 2- |
| Xia, JG et al. Beijing Da Xue Xue Bao Yi Xue Ban 2015. 47(3): 494-498     | RCT                                              | 1  |
| Zhong, T et al. Zhongguo Shi Yan Xue Ye Xue Za Zhi 2018. 26(5): 1484-1491 | Cross sectional case control study               | 2  |
| Luo, Y et al. Zhonghua Wei Zhong Bing Ji Jiu Yi Xue 2020. 32(8): 994-997  | RCT                                              | 1  |
| Zhang, M et al. Perfusion 2020.                                           | RCT                                              | 2+ |

|                                                                                                      |                                  |          |
|------------------------------------------------------------------------------------------------------|----------------------------------|----------|
| Xu, XR et al. Zhonghua Nei Ke Za Zhi 2016. 55(12): 932-936                                           | RCT                              | 1-       |
| Xu, JJ et al. Zhonghua Xin Xue Guan Bing Za Zhi 2017. 45(2): 116-120                                 | Non-randomized prospective study | 2+       |
| <b>Chinese Databases: Chinese language studies</b>                                                   |                                  |          |
| Li, B. Clinical Medicine 2020. 0(1): 57-59                                                           | RCT                              | 1+       |
| Li, D et al. Chinese Clinical Journal of Thoracic and Cardiovascular Surgery 2019. 26(2): 137-141    | Cohort study                     | 2-       |
| Wu, H et al. Shanghai medical journal 2018. 41(1): 9-13                                              | Case control study               | 2+       |
| Cui, Y et al. Chinese Cardiovascular Disease Research 2018. 16(1): 34-38                             | Cohort study                     | 2-       |
| Dana, W et al. Journal of Clinical Cardiovascular Diseases 2018. 34(7): 685-690                      | Cohort study                     | 2-       |
| Chen, Z. Northern Pharmacy 2017. 14(9): 23-23                                                        | Non-randomized prospective study | 2-       |
| Wang, J. Clinical Medicine and Research 2018. 0(66): 64-64                                           | Cohort study                     | 2-       |
| Cui, Y et al. Journal of Integrated Cardiovascular and Cerebrovascular Diseases 2018. 16(4): 461-463 | Case control study               | 2+       |
| Li, G et al. Journal of Clinical Blood Transfusion and Testing 2017. 19(1): 59-63                    | Case control study               | 2+       |
| Miao, L et al. Journal of Clinical Cardiovascular Diseases 2016. 32(4): 334-338                      | RCT                              | 1+ or 1- |
| Ma, Y et al. Modern Applied Pharmacy in China 2017. 34(4): 587-590                                   | Non-randomized prospective study | 2-       |
| Chen, ML et al. Journal of Diagnostic Theory and Practice 2016. 0(2):142-147                         | Non-randomized prospective study | 2-       |
| Wu, Y et al. Journal of Clinical Hematology (Blood Transfusion and Testing) 2016. 29(1): 120-122     | Retrospective study              | 2-       |

|                                                                                                                                                                                                                                                             |                                  |    |
|-------------------------------------------------------------------------------------------------------------------------------------------------------------------------------------------------------------------------------------------------------------|----------------------------------|----|
| World Chinese Association of laboratory and pathologists; Laboratory physicians branch of Chinese Medical Association; Professional Committee of cardiovascular Laboratory Medicine. Journal of Clinical Medical Research and Practice 2018. 3(19): 201-201 | Consensus                        | 4  |
| Wei, H et al. Chinese Journal of Emergency Resuscitation and Disaster Medicine 2018. 13(10): 946-948                                                                                                                                                        | RCT                              | 1- |
| Liang, D et al. Clinical Medicine and Research 2016. 0(58): 186-187                                                                                                                                                                                         | Cohort study                     | 2- |
| Huang, L et al. Chinese Journal of Geriatric Multi-organ Diseases 2017. 16(11): 846-849                                                                                                                                                                     | RCT                              | 1- |
| Hodgs et al. Clinical Medicine and Research 2020. Volume(24): 34-35                                                                                                                                                                                         | RCT                              | 1+ |
| Cui, H. New Word Journal of Diabetes 2019. 22(14): 22-23                                                                                                                                                                                                    | Case control study               | 2- |
| Ren, D et al. Journal of Cardiovascular and Vascular Diseases 2019. 38(7): 725-730                                                                                                                                                                          | Case control study               | 2+ |
| He, W. Modern Medicine and Health 2019. 35(S01): 27-28                                                                                                                                                                                                      | Case control study               | 2- |
| Liu, W et al. Journal of Modern Integrative Medicine 2017. 26(22): 2487-2489                                                                                                                                                                                | Historical comparison            | 2- |
| Zhao, Y et al. Journal of Laboratory Medicine and Clinical 2017. 28(3): 37-40                                                                                                                                                                               | Non-randomized prospective study | 2- |
| Chen, Q. Thrombosis and hemostasis 2016. 22(6): 611-613                                                                                                                                                                                                     | RCT                              | 1- |
| Zhang, Q et al. Chinese Journal of Pharmaceutical Science 2016. 6(11): 97-99                                                                                                                                                                                | RCT                              | 1- |
| YanJun, Y et al. Chinese Journal of General Medicine 2016. 14(8): 1289-1292                                                                                                                                                                                 | Non-randomized prospective study | 2+ |

|                                                                                                                           |                                  |    |
|---------------------------------------------------------------------------------------------------------------------------|----------------------------------|----|
| Zhang, Y et al. Jilin Medicine 2020. 41(7): 1587-1589                                                                     | RCT                              | 1- |
| Zhang, Q et al. Clinical Research Journal 2019. 27(11): 19-21                                                             | Non-randomized prospective study | 2+ |
| Liu, W et al. Lingnan Journal of Cardiovascular Diseases 2019. 25(1): 53-57                                               | Non-randomized prospective study | 2+ |
| Wu, D et al. Chinese Journal of Hospital Pharmacy 2018. 38(7): 759-762                                                    | Non-randomized prospective study | 2- |
| Wu, F. Journal of Contemporary Medicine 2018. 16(24): 25-26                                                               | RCT                              | 1- |
| Miao, L et al. Chinese Journal of Clinical Laboratory Science 2017. 35(6): 439-443                                        | Non-randomized prospective study | 2+ |
| Zhuang, J et al. Chinese Cardiovascular Disease Research 2017. 15(5): 445-450                                             | RCT                              | 1+ |
| Huang, M et al. Journal of Practical Clinical Medicine 2017. 21(12): 49-52                                                | RCT                              | 1- |
| Li, H. Chinese Practical Medical Journal 2016. 43(22): 40-42                                                              | Non-randomized prospective       | 2- |
| Wén, TQ et al. China Medical Guide 2016. 14(4): 165-166                                                                   | Retrospective case control study | 2- |
| Fu, X. Journal of Medical Dietary Therapy and Health 2018. 0(12): 45-45                                                   | Retrospective case control study | 2- |
| Li, X et al. Medical Journal of Chinese People's Armed Police Forces 2018. 29(1): 14-16                                   | RCT                              | 1- |
| Jūn, HY et al. Journal of Integrated Cardiovascular and Cerebrovascular Diseases 2017. 15(3): 358-360                     | Non-randomized prospective study | 2+ |
| Ma, J et al. Journal of Cardiovascular Diseases of Integrated Traditional Chinese and Western Medicine 2016. 4(24): 29-29 | Non-randomized prospective study | 2- |
| Cai, H. Knowledge of Cardiovascular Disease                                                                               | Non-randomized prospective study | 2+ |

|                                                                                                       |                                  |    |
|-------------------------------------------------------------------------------------------------------|----------------------------------|----|
| Prevention and Treatment<br>2020. 10(22): 32-34                                                       |                                  |    |
| Lin, G et al. Thrombosis and Hemostasis 2019. 25(2): 199-201                                          | RCT                              | 1- |
| Zhan, X et al. Chinese Journal of Evidence-based Cardiovascular Medicine 2017. 9(9): 1108-1111        | RCT                              | 1- |
| Xu, Y et al. Modern Practical Medicine 2016. 28(10): 1323-1324                                        | Retrospective case control study | 2+ |
| Wei, H et al. Journal of Hunan University of Traditional Chinese Medicine 2016. 36(A02): 672-673      | RCT                              | 1- |
| Pan, B et al. Modern Medicine 2019. 47(9): 113-1138                                                   | Non-randomized prospective study | 2- |
| Wu, D et al. Journal of Integrated Cardiovascular and Cerebrovascular Diseases 2019. 17(8): 1210-1212 | Retrospective case control study | 2- |
| Shen, W et al. Journal of PLA Medical College 2018. 39(2): 106-109                                    | RCT                              | 1+ |
| Lin, T et al. Chinese Journal of Gerontology 2018. 38(7): 1568-1569                                   | RCT                              | 1- |
| Ma, C et al. Journal of Nanjing Medical University 2018. 38(10): 1415-1420                            | RCT                              | 1- |
| Hou, X et al. Chinese Cardiovascular Disease Research 2016. 14(12): 1081-1085                         | RCT                              | 1- |
| Chen, Z et al. Journal of Clinical Research 2016. 33(11): 2207-2209                                   | Non-randomized prospective study | 2- |
| Hao, Z. Capital Medical Journal 2020. 27(19): 41-42                                                   | Non-randomized prospective study | 2- |
| Brief News. Journal of Military Surgeon in Southwest China 2019. 21(6): 501-504                       | Non-randomized prospective study | 2+ |

|                                                                                                |                                  |    |
|------------------------------------------------------------------------------------------------|----------------------------------|----|
| Du, Y et al. China Medical Herald Journal 2019. 16(11): 50-53                                  | Non-randomized prospective study | 2- |
| Huang, X et al. Anhui Medical Journal 2017. 38(12): 1580-1582                                  | Non-randomized prospective study | 2- |
| Zhang, D et al. Chinese Journal of Modern Medicine 2017. 19(7): 17-20                          | Case control study               | 2- |
| Yan, F et al. Journal of Practical Drugs and Clinics 2017. 20(4): 423-428                      | Non-randomized prospective study | 2- |
| Hu, Z et al. Beijing Medical Journal 2018. 40(9): 818-820                                      | Non-randomized prospective study | 2+ |
| Li, A et al. Chinese Journal of Modern Medicine 2017. 27(1): 94-98                             | Non-randomized prospective study | 2- |
| Bai, Y et al. Chinese Journal of Evidence-based Cardiovascular Medicine 2016. 8(12): 1491-1493 | RCT                              | 1- |
| Pei, Y et al. Journal of Clinical Psychosomatic Diseases 2020. 26(3): 45-47                    | RCT                              | 1- |
| Liu, X et al. Journal of Clinical Hematology (Transfusion and Testing) 2020. 33(3): 425-427    | Non-randomized prospective study | 2- |
| Qiu, Y et al. Journal of Practical Medical Techniques 2020. 27(3): 284-286                     | RCT                              | 1+ |
| Wang, G et al. Journal of Community Medicine 2020. 0(4): 264-268                               | Case control study               | 2+ |
| Zhu, J et al. Journal of Clinical Medicine Literature 2020. 7(96): 166-166                     | RCT                              | 1- |
| Zhang, C et al. Medical Innovation in China 2018. 15(16): 27-30                                | Case control study               | 2- |
| Sun, A et al. Journal of Clinical Cardiovascular Diseases 2017. 33(5): 431-434                 | RCT                              | 1+ |
| Chen, W et al. Medical New Knowledge 2016. 26(5): 338-341                                      | Cohort study                     | 2- |



|                                                                      |                                  |    |
|----------------------------------------------------------------------|----------------------------------|----|
| Zhang, X et al. Shandong<br>Medicine 2016. 56(5): 39-41              | RCT                              | 1- |
| Chen, Z et al. Shanxi Medical<br>Journal 2020. 49(14): 1846-<br>1848 | Retrospective case control study | 2- |

\*In order of increasing bias, SIGN rating describes the levels of evidence ranked 1–4. Study type and quality of data are used to produce four grades of recommendation defined as follows; 1++: high quality meta-analyses, systematic reviews of RCTs, or RCTs with very low risk of bias; 1+: well-conducted meta-analyses, systematic reviews, or RCTs with a low risk of bias; 1-: meta-analyses, systematic reviews, or RCTs with a high risk of bias; 2++: high quality systematic reviews of case control or cohort studies, high quality case control or cohort studies with a very low risk of confounding or bias and a high probability that the relationship is causal; 2+: well conducted case control or cohort studies with a low risk of confounding or bias and a moderate probability that the relationship is causal; 2-: case control or cohort studies with a high risk of confounding or bias and a significant risk that the relationship is not causal; 3: non-analytic studies, e.g., case reports, case series; 4: expert opinion

SIGN, Scottish intercollegiate guidelines network; RCT, randomized controlled trial
